# Supplementary material for: Short-Term Efficacy of Using a Novel Low-Volume Bone Marrow Aspiration Technique to Treat Knee Osteoarthritis: A Retrospective Cohort Study
Source: Hindawi journal article supplement (doi:10.1155/2022/5394441), 2022-11-15
Supplement: f2 [file 5394441.f2.pdf]

Supplementary Table 1

| Patient Number | Age | Sex | Baseline     |       |     |              | Patient Number | Age | Sex | Follow Up    |       |     |      |
|----------------|-----|-----|--------------|-------|-----|--------------|----------------|-----|-----|--------------|-------|-----|------|
|                |     |     | Knee (L) (R) | Womac | VAS | PGIC (6 wks) |                |     |     | Knee (L) (R) | Womac | VAS | PGIC |
| 1              | 65  | F   | L            | 17.4  | 10  | 5            | 1              | 65  | F   | L            | 92.0  | 0   | 7    |
| 1              | 65  | F   | R            | 17.4  | 10  | 6            | 1              | 65  | F   | R            | 92.0  | 0   | 7    |
| 2              | 58  | M   | L            | 62.1  | 2   | 6            | 2              | 58  | M   | L            | 90.9  | 2   | 6    |
| 2              | 58  | M   | R            | 62.1  | 5   | 6            | 2              | 58  | M   | R            | 90.9  | 2   | 7    |
| 3              | 63  | M   | R            | 74.2  | 5   | 2            | 3              | 63  | M   | R            | 74.2  | 5   | 2    |
| 4              | 75  | M   | L            | 77.0  | 8   | 1            | 4              | 75  | M   | L            | 53.0  | 7   | 1    |
| 4              | 75  | M   | R            | 77.0  | 4   | 2            | 4              | 75  | M   | R            | 53.0  | 1   | 2    |
| 5              | 38  | M   | R            | 78.7  | 7   | 5            | 5              | 38  | M   | R            | 95.4  | 2   | 4    |
| 6              | 65  | M   | L            | 23.4  | 9   | 6            | 6              | 65  | M   | L            | 45.4  | 5   | 5    |
| 6              | 65  | M   | R            | 23.4  | 9   | 5            | 6              | 65  | M   | R            | 45.4  | 7   | 2    |
| 7              | 67  | F   | R            | 78.0  | 8   | 7            | 7              | 67  | F   | R            | 100.0 | 0   | 7    |
| 8              | 64  | F   | L            | 58.3  | 4   | 5            | 8              | 64  | F   | L            | 90.9  | 2   | 5    |
| 8              | 64  | F   | R            | 58.3  | 6   | 5            | 8              | 64  | F   | R            | 90.9  | 2   | 5    |
| 9              | 71  | M   | L            | 60.6  | 8   | 3            | 9              | 71  | M   | L            | 59.8  | 3   | 4    |
| 9              | 71  | M   | R            | 60.6  | 8   | 5            | 9              | 71  | M   | R            | 59.8  | 3   | 4    |
| 10             | 60  | M   | L            | 49.2  | 8   | 5            | 10             | 60  | M   | L            | 56.8  | 4   | 5    |
| 10             | 60  | M   | R            | 49.2  | 8   | 6            | 10             | 60  | M   | R            | 56.8  | 4   | 5    |
| 11             | 55  | F   | L            | 48.4  | 6   | 5            | 11             | 55  | F   | L            | 60.6  | 5   | 5    |
| 11             | 55  | F   | R            | 48.4  | 6   | 5            | 11             | 55  | F   | R            | 60.6  | 5   | 5    |
| 12             | 72  | F   | L            | 46.2  | 7   | 3            | 12             | 72  | F   | L            | 91.6  | 2   | 5    |
| 12             | 72  | F   | R            | 46.2  | 7   | 3            | 12             | 72  | F   | R            | 91.6  | 2   | 5    |
| 13             | 60  | F   | L            | 54.5  | 5   | 7            | 13             | 60  | F   | L            | 60.6  | 6   | 4    |
| 13             | 60  | F   | R            | 54.5  | 8   | 5            | 13             | 60  | F   | R            | 60.6  | 6   | 4    |
| 14             | 61  | M   | L            | 31.8  | 10  | 3            | 14             | 61  | M   | L            | 43.2  | 5   | 5    |
| 14             | 61  | M   | R            | 31.8  | 10  | 3            | 14             | 61  | M   | R            | 43.2  | 5   | 5    |
| 15             | 88  | F   | L            | 49.2  | 4   | 1            | 15             | 88  | F   | L            | 33.3  | 1   | 1    |
| 15             | 88  | F   | R            | 49.2  | 10  | 1            | 15             | 88  | F   | R            | 33.3  | 10  | 1    |
| 16             | 68  | F   | L            | 46.2  | 2   | 6            | 16             | 68  | F   | L            | 78.7  | 1   | 7    |
| 16             | 68  | F   | R            | 46.2  | 4   | 6            | 16             | 68  | F   | R            | 78.7  | 1   | 6    |
| 17             | 56  | F   | L            | 26.5  | 6   | 6            | 17             | 56  | F   | L            | 84.1  | 0   | 6    |
| 17             | 56  | F   | R            | 26.5  | 10  | 5            | 17             | 56  | F   | R            | 84.1  | 0   | 6    |
| 18             | 46  | M   | L            | 72.7  | 6   | 3            | 18             | 46  | M   | L            | 98.4  | 4   | 7    |
| 18             | 46  | M   | R            | 72.7  | 5   | 3            | 18             | 46  | M   | R            | 98.4  | 4   | 7    |
| 19             | 66  | M   | L            | 27.2  | 6   | 6            | 19             | 66  | M   | L            | 74.2  | 8   | 6    |
| 19             | 66  | M   | R            | 27.2  | 9   | 5            | 19             | 66  | M   | R            | 74.2  | 7   | 5    |
| 20             | 39  | M   | L            | 47.0  | 7   | 5            | 20             | 39  | M   | L            | 85.6  | 1   | 7    |
| 20             | 39  | M   | R            | 47.0  | 7   | 6            | 20             | 39  | M   | R            | 85.6  | 1   | 7    |
| 21             | 52  | M   | L            | 71.9  | 9   | 3            | 21             | 52  | M   | L            | 61.4  | 8   | 5    |
| 21             | 52  | M   | R            | 71.9  | 9   | 3            | 21             | 52  | M   | R            | 61.4  | 7   | 4    |
| 22             | 46  | F   | L            | 41.6  | 9   | 1            | 22             | 46  | F   | L            | 82.5  | 4   | 5    |
| 22             | 46  | F   | R            | 41.6  | 9   | 3            | 22             | 46  | F   | R            | 82.5  | 0   | 5    |
| 23             | 63  | M   | L            | 58.3  | 3   | 4            | 23             | 63  | M   | L            | 72.7  | 1   | 7    |
| 23             | 63  | M   | R            | 58.3  | 5   | 5            | 23             | 63  | M   | R            | 72.7  | 2   | 6    |
| 24             | 59  | M   | L            | 21.1  | 10  | 3            | 24             | 59  | M   | L            | 46.2  | 6   | 4    |
| 24             | 59  | M   | R            | 21.1  | 10  | 2            | 24             | 59  | M   | R            | 46.2  | 10  | 4    |
| 25             | 68  | F   | L            | 9.0   | 10  | 4            | 25             | 68  | F   | L            | 2.0   | 10  | 1    |
| 25             | 68  | F   | R            | 9.0   | 8   | 4            | 25             | 68  | F   | R            | 2.0   | 9   | 2    |
| 26             | 76  | F   | L            | 42.4  | 9   | 7            | 26             | 76  | F   | L            | 92.4  | 0   | 6    |
| 26             | 76  | F   | R            | 42.4  | 9   | 7            | 26             | 76  | F   | R            | 92.4  | 0   | 7    |
| 27             | 82  | F   | L            | 49.0  | 9   | 1            | 27             | 82  | F   | L            | 63.6  | 7   | 2    |
| 27             | 82  | F   | R            | 49.0  | 7   | 1            | 27             | 82  | F   | R            | 63.6  | 7   | 2    |
| 28             | 51  | F   | L            | 56.8  | 8   | 5            | 28             | 51  | F   | L            | 70.4  | 4   | 6    |
| 28             | 51  | F   | R            | 56.8  | 5   | 5            | 28             | 51  | F   | R            | 70.4  | 4   | 6    |
| 29             | 78  | M   | L            | 50.0  | 8   | 5            | 29             | 78  | M   | L            | 65.9  | 0   | 5    |

|    |    |   |   |      |    |   |    |    |   |   |      |    |   |
|----|----|---|---|------|----|---|----|----|---|---|------|----|---|
| 29 | 78 | M | R | 50.0 | 8  | 4 | 29 | 78 | M | R | 65.9 | 1  | 5 |
| 30 | 69 | F | L | 49.2 | 7  | 5 | 30 | 69 | F | L | 70.4 | 8  | 6 |
| 30 | 69 | F | R | 49.2 | 7  | 5 | 30 | 69 | F | R | 70.4 | 7  | 5 |
| 31 | 83 | M | L | 89.4 | 7  | 5 | 31 | 83 | M | L | 70.4 | 8  | 4 |
| 31 | 83 | M | R | 89.4 | 7  | 6 | 31 | 83 | M | R | 70.4 | 3  | 6 |
| 32 | 75 | F | L | 30.3 | 10 | 1 | 32 | 75 | F | L | 55.3 | 7  | 2 |
| 32 | 75 | F | R | 30.3 | 3  | 1 | 32 | 75 | F | R | 55.3 | 5  | 2 |
| 33 | 44 | F | L | 59.0 | 4  | 6 | 33 | 44 | F | L | 99.2 | 0  | 6 |
| 33 | 44 | F | R | 59.0 | 4  | 6 | 33 | 44 | F | R | 99.2 | 0  | 6 |
| 34 | 67 | F | L | 80.3 | 7  | 2 | 34 | 67 | F | L | 75.0 | 3  | 5 |
| 34 | 67 | F | R | 80.3 | 7  | 3 | 34 | 67 | F | R | 75.0 | 2  | 5 |
| 35 | 43 | M | L | 30.3 | 9  | 5 | 35 | 43 | M | L | 92.4 | 0  | 6 |
| 36 | 46 | F | L | 64.3 | 9  | 4 | 36 | 46 | F | L | 46.2 | 5  | 4 |
| 36 | 46 | F | R | 64.3 | 9  | 4 | 36 | 46 | F | R | 46.2 | 7  | 4 |
| 37 | 58 | F | L | 19.6 | 5  | 3 | 37 | 58 | F | L | 61.3 | 4  | 2 |
| 37 | 58 | F | R | 19.6 | 5  | 3 | 37 | 58 | F | R | 61.3 | 5  | 2 |
| 38 | 82 | M | R | 89.3 | 6  | 3 | 38 | 82 | M | R | 90.9 | 5  | 1 |
| 39 | 75 | M | R | 78.7 | 5  | 1 | 39 | 75 | M | R | 87.9 | 2  | 4 |
| 40 | 71 | F | L | 44.6 | 10 | 5 | 40 | 71 | F | L | 71.9 | 10 | 2 |
| 40 | 71 | F | R | 44.6 | 8  | 5 | 40 | 71 | F | R | 71.9 | 0  | 7 |
| 41 | 68 | F | L | 37.8 | 6  | 5 | 41 | 68 | F | L | 53.7 | 3  | 5 |
| 41 | 68 | F | R | 37.8 | 8  | 3 | 41 | 68 | F | R | 53.7 | 6  | 3 |
| 42 | 50 | M | L | 41.6 | 7  | 7 | 42 | 50 | M | L | 97.0 | 0  | 7 |
| 42 | 50 | M | R | 41.6 | 7  | 7 | 42 | 50 | M | R | 97.0 | 0  | 7 |
| 43 | 83 | F | L | 50.0 | 8  | 4 | 43 | 83 | F | L | 68.1 | 0  | 3 |
| 43 | 83 | F | R | 50.0 | 8  | 2 | 43 | 83 | F | R | 68.1 | 4  | 5 |
| 44 | 71 | M | L | 53.7 | 8  | 3 | 44 | 71 | M | L | 35.6 | 9  | 1 |
| 44 | 71 | M | R | 53.7 | 8  | 3 | 44 | 71 | M | R | 35.6 | 9  | 1 |
| 45 | 59 | F | L | 57.6 | 7  | 6 | 45 | 59 | F | L | 98.5 | 0  | 7 |
| 45 | 59 | F | R | 57.6 | 7  | 6 | 45 | 59 | F | R | 98.5 | 0  | 7 |
| 46 | 61 | F | L | 58.3 | 6  | 7 | 46 | 61 | F | L | 72.0 | 0  | 7 |
| 46 | 61 | F | R | 58.3 | 6  | 7 | 46 | 61 | F | R | 72.0 | 2  | 6 |
| 47 | 56 | F | L | 34.1 | 3  | 6 | 47 | 56 | F | L | 63.6 | 3  | 6 |
| 47 | 56 | F | R | 34.1 | 8  | 2 | 47 | 56 | F | R | 63.6 | 7  | 5 |
| 48 | 84 | F | L | 56.8 | 4  | 4 | 48 | 84 | F | L | 67.4 | 1  | 1 |
| 48 | 84 | F | R | 56.8 | 4  | 5 | 48 | 84 | F | R | 67.4 | 4  | 2 |
| 49 | 83 | F | L | 11.3 | 10 | 7 | 49 | 83 | F | L | 62.1 | 2  | 7 |
| 49 | 83 | F | R | 11.3 | 10 | 7 | 49 | 83 | F | R | 62.1 | 3  | 7 |
| 50 | 66 | M | L | 65.1 | 5  | 4 | 50 | 66 | M | L | 56.1 | 5  | 5 |
| 50 | 66 | M | R | 65.1 | 5  | 4 | 50 | 66 | M | R | 56.1 | 0  | 6 |
| 51 | 55 | M | R | 53.0 | 9  | 7 | 51 | 55 | M | R | 90.2 | 6  | 7 |
| 52 | 68 | F | L | 46.9 | 6  | 3 | 52 | 68 | F | L | 82.5 | 0  | 6 |
| 52 | 68 | F | R | 46.9 | 3  | 3 | 52 | 68 | F | R | 82.5 | 0  | 7 |
| 53 | 52 | F | L | 8.3  | 10 | 2 | 53 | 52 | F | L | 37.1 | 8  | 4 |
| 53 | 52 | F | R | 8.3  | 10 | 5 | 53 | 52 | F | R | 37.1 | 10 | 2 |
| 54 | 50 | M | L | 70.4 | 6  | 1 | 54 | 50 | M | L | 76.5 | 4  | 1 |
| 54 | 50 | M | R | 70.4 | 2  | 1 | 54 | 50 | M | R | 76.5 | 1  | 1 |
| 55 | 65 | F | L | 50.7 | 7  | 6 | 55 | 65 | F | L | 92.4 | 0  | 7 |
| 56 | 40 | F | L | 32.5 | 10 | 3 | 56 | 40 | F | L | 26.5 | 5  | 2 |
| 57 | 54 | M | L | 35.6 | 10 | 2 | 57 | 54 | M | L | 39.4 | 6  | 4 |
| 57 | 54 | M | R | 35.6 | 10 | 2 | 57 | 54 | M | R | 39.4 | 6  | 3 |
| 58 | 66 | M | L | 58.3 | 8  | 1 | 58 | 66 | M | L | 92.6 | 0  | 7 |
| 59 | 68 | F | L | 74.2 | 3  | 6 | 59 | 68 | F | L | 51.5 | 2  | 2 |
| 60 | 63 | F | L | 27.2 | 8  | 7 | 60 | 63 | F | L | 42.4 | 5  | 4 |
| 60 | 63 | F | R | 27.2 | 10 | 6 | 60 | 63 | F | R | 42.4 | 5  | 3 |
| 61 | 46 | F | L | 73.4 | 8  | 2 | 61 | 46 | F | L | 74.2 | 7  | 5 |
| 61 | 46 | F | R | 73.4 | 8  | 2 | 61 | 46 | F | R | 74.2 | 7  | 6 |

|    |    |   |   |      |    |   |    |    |   |   |      |   |   |
|----|----|---|---|------|----|---|----|----|---|---|------|---|---|
| 62 | 65 | F | L | 35.6 | 10 | 7 | 62 | 65 | F | L | 91.7 | 0 | 7 |
| 62 | 65 | F | R | 35.6 | 10 | 5 | 62 | 65 | F | R | 91.7 | 0 | 6 |
| 63 | 59 | M | L | 38.6 | 7  | 6 | 63 | 59 | M | L | 68.2 | 1 | 5 |
| 63 | 59 | M | R | 38.6 | 3  | 5 | 63 | 59 | M | R | 68.2 | 0 | 6 |
| 64 | 89 | F | L | 43.1 | 8  | 2 | 64 | 89 | F | L | 72.7 | 2 | 6 |
| 64 | 89 | F | R | 43.1 | 8  | 4 | 64 | 89 | F | R | 72.7 | 2 | 6 |
| 65 | 58 | M | L | 43.9 | 7  | 4 | 65 | 58 | M | L | 87.8 | 3 | 4 |
| 65 | 58 | M | R | 43.9 | 7  | 6 | 65 | 58 | M | R | 87.8 | 0 | 7 |
| 66 | 55 | M | L | 57.5 | 8  | 1 | 66 | 55 | M | L | 77.2 | 5 | 5 |
| 66 | 55 | M | R | 57.5 | 8  | 1 | 66 | 55 | M | R | 77.2 | 5 | 5 |
| 67 | 71 | F | L | 46.9 | 6  | 5 | 67 | 71 | F | L | 73.4 | 2 | 6 |
| 67 | 71 | F | R | 46.9 | 8  | 5 | 67 | 71 | F | R | 73.4 | 3 | 6 |
| 68 | 84 | F | L | 9.0  | 10 | 4 | 68 | 84 | F | L | 38.6 | 5 | 7 |
| 68 | 84 | F | R | 9.0  | 10 | 3 | 68 | 84 | F | R | 38.6 | 7 | 5 |
| 69 | 61 | F | L | 50.7 | 8  | 3 | 69 | 61 | F | L | 62.1 | 3 | 5 |
| 69 | 61 | F | R | 50.7 | 8  | 3 | 69 | 61 | F | R | 62.1 | 3 | 4 |
| 70 | 49 | F | R | 23.4 | 10 | 3 | 70 | 49 | F | R | 85.6 | 6 | 5 |
| 71 | 83 | M | L | 70.4 | 3  | 3 | 71 | 83 | M | L | 65.1 | 2 | 5 |
| 72 | 79 | M | L | 64.4 | 7  | 2 | 72 | 79 | M | L | 40.9 | 6 | 2 |
| 72 | 79 | M | R | 64.4 | 7  | 2 | 72 | 79 | M | R | 40.9 | 6 | 2 |
| 73 | 83 | M | L | 46.0 | 10 | 4 | 73 | 83 | M | L | 53.0 | 5 | 5 |
| 73 | 83 | M | R | 46.0 | 10 | 5 | 73 | 83 | M | R | 53.0 | 7 | 3 |
| 74 | 64 | M | R | 61.3 | 8  | 5 | 74 | 64 | M | R | 80.3 | 2 | 6 |
| 75 | 53 | F | R | 71.9 | 8  | 4 | 75 | 53 | F | R | 61.4 | 0 | 6 |
| 76 | 77 | F | L | 78.8 | 5  | 2 | 76 | 77 | F | L | 48.4 | 8 | 4 |
| 76 | 77 | F | R | 78.8 | 5  | 2 | 76 | 77 | F | R | 48.4 | 5 | 4 |
| 77 | 69 | F | L | 50.0 | 8  | 5 | 77 | 69 | F | L | 65.1 | 4 | 6 |
| 77 | 69 | F | R | 50.0 | 8  | 5 | 77 | 69 | F | R | 65.1 | 4 | 6 |
| 78 | 41 | F | R | 39.4 | 10 | 5 | 78 | 41 | F | R | 50.0 | 5 | 5 |
| 79 | 69 | F | L | 29.5 | 9  | 6 | 79 | 69 | F | L | 55.0 | 3 | 5 |
| 79 | 69 | F | R | 29.5 | 9  | 6 | 79 | 69 | F | R | 55.0 | 3 | 5 |
| 80 | 61 | M | L | 93.1 | 6  | 6 | 80 | 61 | M | L | 84.0 | 3 | 6 |
| 81 | 61 | M | L | 62.8 | 5  | 3 | 81 | 61 | M | L | 72.0 | 4 | 2 |
| 81 | 61 | M | R | 62.8 | 5  | 3 | 81 | 61 | M | R | 72.0 | 4 | 2 |
| 82 | 66 | F | L | 46.2 | 7  | 3 | 82 | 66 | F | L | 59.0 | 4 | 5 |
| 82 | 66 | F | R | 46.2 | 7  | 3 | 82 | 66 | F | R | 59.0 | 4 | 3 |
| 83 | 72 | M | L | 86.3 | 1  | 4 | 83 | 72 | M | L | 88.6 | 0 | 5 |
| 83 | 72 | M | R | 86.3 | 2  | 4 | 83 | 72 | M | R | 88.6 | 1 | 6 |
| 84 | 71 | M | L | 25.0 | 6  | 4 | 84 | 71 | M | L | 70.5 | 1 | 4 |
| 84 | 71 | M | R | 25.0 | 6  | 3 | 84 | 71 | M | R | 70.5 | 1 | 4 |
| 85 | 74 | M | L | 33.3 | 7  | 3 | 85 | 74 | M | L | 80.3 | 3 | 6 |
| 85 | 74 | M | R | 33.3 | 7  | 3 | 85 | 74 | M | R | 80.3 | 3 | 6 |
| 86 | 72 | M | L | 80.3 | 3  | 2 | 86 | 72 | M | L | 62.1 | 5 | 1 |
| 86 | 72 | M | R | 80.3 | 2  | 3 | 86 | 72 | M | R | 62.1 | 6 | 1 |
| 87 | 64 | M | R | 53.0 | 7  | 5 | 87 | 64 | M | R | 68.2 | 5 | 5 |
| 88 | 72 | F | L | 53.7 | 8  | 5 | 88 | 72 | F | L | 82.6 | 2 | 6 |
| 88 | 72 | F | R | 53.7 | 8  | 6 | 88 | 72 | F | R | 82.6 | 1 | 7 |
| 89 | 73 | F | L | 76.5 | 10 | 3 | 89 | 73 | F | L | 86.3 | 2 | 4 |
| 89 | 73 | F | R | 76.5 | 10 | 4 | 89 | 73 | F | R | 86.3 | 2 | 4 |
| 90 | 44 | F | L | 44.7 | 9  | 4 | 90 | 44 | F | L | 86.4 | 0 | 7 |
| 90 | 44 | F | R | 44.7 | 9  | 5 | 90 | 44 | F | R | 86.4 | 2 | 7 |
| 91 | 59 | M | L | 52.2 | 8  | 2 | 91 | 59 | M | L | 70.4 | 8 | 3 |
| 91 | 59 | M | R | 52.2 | 8  | 3 | 91 | 59 | M | R | 70.4 | 5 | 4 |
| 92 | 59 | F | L | 40.2 | 10 | 3 | 92 | 59 | F | L | 55.3 | 6 | 6 |
| 92 | 59 | F | R | 40.2 | 10 | 3 | 92 | 59 | F | R | 55.3 | 8 | 4 |
| 93 | 66 | M | L | 24.2 | 3  | 4 | 93 | 66 | M | L | 24.2 | 0 | 4 |
| 93 | 66 | M | R | 24.2 | 6  | 2 | 93 | 66 | M | R | 24.2 | 2 | 5 |

|     |    |   |   |      |    |   |     |    |   |   |      |   |                                |
|-----|----|---|---|------|----|---|-----|----|---|---|------|---|--------------------------------|
| 94  | 84 | M | L | 33.3 | 8  | 3 | 94  | 84 | M | L | 64.4 | 3 | 3                              |
| 94  | 84 | M | R | 33.3 | 8  | 2 | 94  | 84 | M | R | 64.4 | 5 | 2                              |
| 95  | 59 | F | L | 55.3 | 9  | 6 | 95  | 59 | F | L | 43.9 | 2 | 6                              |
| 95  | 59 | F | R | 55.3 | 9  | 5 | 95  | 59 | F | R | 43.9 | 2 | 6                              |
| 96  | 78 | F | L | 57.6 | 6  | 3 | 96  | 78 | F | L | 63.6 | 0 | 6                              |
| 96  | 78 | F | R | 57.6 | 6  | 1 | 96  | 78 | F | R | 63.6 | 3 | 5                              |
| 97  | 78 | M | L |      | 8  |   | 97  | 78 | M | L |      | 6 |                                |
| 97  | 78 | M | R |      | 8  |   | 97  | 78 | M | R |      | 6 |                                |
| 98  | 73 | F | L |      | 10 |   | 98  | 73 | F | L |      | 5 |                                |
| 98  | 73 | F | R |      | 10 |   | 98  | 73 | F | R |      | 5 |                                |
| 99  | 51 | M | L |      | 1  |   | 99  | 51 | M | L |      | 0 |                                |
| 99  | 51 | M | R |      | 8  |   | 99  | 51 | M | R |      | 7 |                                |
| 100 | 71 | M | L |      | 5  |   | 100 | 71 | M | L |      | 2 |                                |
| 101 | 65 | M | L |      | 7  |   | 101 | 65 | M | L |      | 7 |                                |
| 101 | 65 | M | R |      | 9  |   | 101 | 65 | M | R |      | 8 |                                |
| 102 | 79 | M | L |      | 7  |   | 102 | 79 | M | L |      | 0 |                                |
| 103 | 74 | M | L |      | 8  |   | 103 | 74 | M | L |      | 7 |                                |
| 104 | 78 | F | L |      | 6  |   | 104 | 78 | F | L |      | 9 |                                |
| 105 | 59 | F | L |      | 8  |   | 105 | 59 | F | L |      | 8 |                                |
| 105 | 59 | F | R |      | 9  |   | 105 | 59 | F | R |      | 7 |                                |
| 106 | 67 | F | L |      | 9  |   | 106 | 67 | F | L |      | 5 |                                |
| 107 | 37 | M | R |      | 7  |   | 107 | 37 | M | R |      | 1 |                                |
| 108 | 49 | M | L |      | 2  |   | 108 | 49 | M | L |      | 0 |                                |
| 109 | 62 | F | L |      | 8  |   | 109 | 62 | F | L |      | 2 |                                |
| 109 | 62 | F | R |      | 8  |   | 109 | 62 | F | R |      | 3 |                                |
| 110 | 50 | M | L |      | 10 |   | 110 | 50 | M | L |      | 5 |                                |
| 111 | 36 | M | L |      | 10 |   | 111 | 36 | M | L |      | 5 |                                |
| 112 | 69 | F | R |      | 7  |   | 112 | 69 | F | R |      | 3 |                                |
| 113 | 49 | F | L |      | 5  |   | 113 | 49 | F | L |      | 4 |                                |
| 113 | 49 | F | R |      | 5  |   | 113 | 49 | F | R |      | 4 |                                |
| 114 | 59 | F | L |      | 8  |   | 114 | 59 | F | L |      | 0 |                                |
| 114 | 59 | F | R |      | 6  |   | 114 | 59 | F | R |      | 0 |                                |
| 115 | 85 | F | L |      | 3  |   | 115 | 85 | F | L |      | 1 |                                |
| 115 | 85 | F | R |      | 8  |   | 115 | 85 | F | R |      | 4 |                                |
| 116 | 61 | F | L |      | 2  |   | 116 | 61 | F | L |      | 1 |                                |
| 117 | 57 | F | R |      | 7  |   | 117 | 57 | F | R |      | 2 |                                |
| 118 | 41 | M | R |      | 8  |   | 118 | 41 | M | R |      | 1 |                                |
| 119 | 50 | M | R |      | 10 |   | 119 | 50 | M | R |      | 7 |                                |
| 120 | 47 | F | R |      | 7  |   | 120 | 47 | F | R |      | 3 |                                |
| 121 | 57 | M | R |      | 8  |   | 121 | 57 | M | R |      | 5 |                                |
| 122 | 18 | M | R |      | 7  |   | 122 | 18 | M | R |      | 1 | tudy due to young age--outlier |
| 123 | 65 | M | R |      | 4  |   | 123 | 65 | M | R |      | 0 |                                |
| 124 | 62 | F | R |      | 9  |   | 124 | 62 | F | R |      | 2 |                                |
| 125 | 58 | M | L |      | 5  |   | 125 | 58 | M | L |      | 4 |                                |
| 126 | 68 | F | L |      | 8  |   | 126 | 68 | F | L |      | 1 |                                |
| 127 | 83 | M | R |      | 6  |   | 127 | 83 | M | R |      | 6 |                                |
| 128 | 60 | M | R |      | 9  |   | 128 | 60 | M | R |      | 3 |                                |
| 129 | 69 | F | L |      | 3  |   | 129 | 69 | F | L |      | 1 |                                |
| 130 | 54 | M | L |      | 8  |   | 130 | 54 | M | L |      | 8 |                                |
| 130 | 54 | M | R |      | 8  |   | 130 | 54 | M | R |      | 5 |                                |
| 131 | 58 | M | L |      | 5  |   | 131 | 58 | M | L |      | 0 |                                |
| 132 | 57 | F | L |      | 10 |   | 132 | 57 | F | L |      | 1 |                                |
| 133 | 54 | M | L |      | 8  |   | 133 | 54 | M | L |      | 9 |                                |
| 134 | 57 | F | L |      | 8  |   | 134 | 57 | F | L |      | 8 |                                |
| 134 | 57 | F | R |      | 8  |   | 134 | 57 | F | R |      | 8 |                                |
| 135 | 70 | F | R |      | 9  |   | 135 | 70 | F | R |      | 1 |                                |
| 136 | 54 | F | R |      | 6  |   | 136 | 54 | F | R |      | 2 |                                |

|     |    |   |   |    |
|-----|----|---|---|----|
| 137 | 71 | M | L | 4  |
| 138 | 69 | M | L | 8  |
| 138 | 69 | M | R | 8  |
| 139 | 65 | M | L | 8  |
| 139 | 65 | M | R | 8  |
| 140 | 72 | F | L | 8  |
| 140 | 72 | F | R | 8  |
| 141 | 87 | M | R | 8  |
| 142 | 63 | M | L | 5  |
| 142 | 63 | M | R | 5  |
| 143 | 61 | M | L | 8  |
| 143 | 61 | M | R | 8  |
| 144 | 47 | F | R | 10 |
| 145 | 48 | M | R | 9  |
| 146 | 64 | F | L | 8  |
| 147 | 38 | F | R | 4  |
| 148 | 51 | M | L | 10 |
| 148 | 51 | M | R | 10 |
| 149 | 83 | M | L | 8  |
| 149 | 83 | M | R | 8  |
| 150 | 84 | F | L | 10 |
| 150 | 84 | F | R | 10 |
| 151 | 77 | F | L | 5  |
| 151 | 77 | F | R | 5  |
| 152 | 78 | M | R | 10 |
| 153 | 62 | F | L | 10 |
| 153 | 62 | F | R | 10 |
| 154 | 76 | F | L | 10 |
| 154 | 76 | F | R | 10 |
| 155 | 49 | M | L | 8  |
| 156 | 67 | M | R | 7  |
| 157 | 72 | F | L | 5  |
| 158 | 52 | M | L | 6  |
| 159 | 71 | F | L | 6  |
| 159 | 71 | F | R | 10 |
| 160 | 53 | F | R | 10 |
| 161 | 46 | M | L | 9  |
| 161 | 46 | M | R | 9  |

|     |    |   |   |    |
|-----|----|---|---|----|
| 137 | 71 | M | L | 3  |
| 138 | 69 | M | L | 0  |
| 138 | 69 | M | R | 5  |
| 139 | 65 | M | L | 8  |
| 139 | 65 | M | R | 10 |
| 140 | 72 | F | L | 7  |
| 140 | 72 | F | R | 7  |
| 141 | 87 | M | R | 6  |
| 142 | 63 | M | L | 8  |
| 142 | 63 | M | R | 7  |
| 143 | 61 | M | L | 8  |
| 143 | 61 | M | R | 5  |
| 144 | 47 | F | R | 9  |
| 145 | 48 | M | R | 3  |
| 146 | 64 | F | L | 4  |
| 147 | 38 | F | R | 0  |
| 148 | 51 | M | L | 4  |
| 148 | 51 | M | R | 3  |
| 149 | 83 | M | L | 3  |
| 149 | 83 | M | R | 1  |
| 150 | 84 | F | L | 6  |
| 150 | 84 | F | R | 4  |
| 151 | 77 | F | L | 6  |
| 151 | 77 | F | R | 2  |
| 152 | 78 | M | R | 2  |
| 153 | 62 | F | L | 7  |
| 153 | 62 | F | R | 8  |
| 154 | 76 | F | L | 6  |
| 154 | 76 | F | R | 2  |
| 155 | 49 | M | L | 2  |
| 156 | 67 | M | R | 6  |
| 157 | 72 | F | L | 5  |
| 158 | 52 | M | L | 3  |
| 159 | 71 | F | L | 6  |
| 159 | 71 | F | R | 1  |
| 160 | 53 | F | R | 8  |
| 161 | 46 | M | L | 0  |
| 161 | 46 | M | R | 0  |
